# Supplementary material for: Butanolides and Butenolides from a Marine-Derived Streptomyces sp. Exert Neuroprotective Activity through Activation of the TrkB Neurotrophin Receptor
Source: MDPI journal article supplement (doi:10.3390/md21090465), 2023-08-25
Supplement: s1 [file s1]

# Supplementary Materials for

## Butanolides and Butenolides from a Marine-derived *Streptomyces* sp. Exert Neuroprotective Activity through Activation of the TrkB Neurotrophin Receptor

Paolo Giaccio <sup>1</sup>, Despoina Charou <sup>2,3</sup>, Dafni-Ioanna Diakaki <sup>1</sup>, Anna Chita <sup>2,3</sup>, Achille Gravanis <sup>2,3</sup>, Ioannis Charalampopoulos <sup>2,3</sup>, Vassilios Roussis <sup>1</sup> and Efstathia Ioannou <sup>1,\*</sup>

<sup>1</sup> Section of Pharmacognosy and Chemistry of Natural Products, Department of Pharmacy, National and Kapodistrian University of Athens, Panepistimiopolis Zografou, Athens 15771, Greece; pgiaccio@pharm.uoa.gr (P.G.); dafnid@pharm.uoa.gr (D.-I.D.); roussis@pharm.uoa.gr (V.R.)

<sup>2</sup> Department of Pharmacology, Medical School, University of Crete, Heraklion 71003, Greece; dcharou@gmail.com (D.C.); anna.chita2@gmail.com (A.C.); gravanis@med.uoc.gr (A.G.); charalampn@uoc.gr (I.C.)

<sup>3</sup> Institute of Molecular Biology & Biotechnology, Foundation for Research & Technology-Hellas (IMBB-FORTH), Heraklion 70013, Greece

\* Correspondence: eioannou@pharm.uoa.gr; Tel.: +30 210 727 4913

## Table of Contents

|                    |                                                                                               |     |
|--------------------|-----------------------------------------------------------------------------------------------|-----|
| <b>Figure S1.</b>  | <sup>1</sup> H NMR spectrum (CDCl <sub>3</sub> ) of compound <b>1</b> .                       | S3  |
| <b>Figure S2.</b>  | HSQC-DEPT spectrum (CDCl <sub>3</sub> ) of compound <b>1</b> .                                | S3  |
| <b>Figure S3.</b>  | HMBC spectrum (CDCl <sub>3</sub> ) of compound <b>1</b> .                                     | S4  |
| <b>Figure S4.</b>  | COSY spectrum (CDCl <sub>3</sub> ) of compound <b>1</b> .                                     | S4  |
| <b>Figure S5.</b>  | 1D NOE difference spectrum (CDCl <sub>3</sub> ) of compound <b>1</b> upon irradiation of H-2. | S5  |
| <b>Figure S6.</b>  | 1D NOE difference spectrum (CDCl <sub>3</sub> ) of compound <b>1</b> upon irradiation of H-3. | S5  |
| <b>Figure S7.</b>  | HR-ESIMS spectrum of compound <b>1</b> .                                                      | S6  |
| <b>Figure S8.</b>  | <sup>1</sup> H NMR spectrum (CDCl <sub>3</sub> ) of compound <b>2</b> .                       | S7  |
| <b>Figure S9.</b>  | EIMS spectrum of compound <b>2</b> .                                                          | S7  |
| <b>Figure S10.</b> | <sup>1</sup> H NMR spectrum (CDCl <sub>3</sub> ) of compound <b>3</b> .                       | S8  |
| <b>Figure S11.</b> | EIMS spectrum of compound <b>3</b> .                                                          | S8  |
| <b>Figure S12.</b> | <sup>1</sup> H NMR spectrum (CDCl <sub>3</sub> ) of compound <b>4</b> .                       | S9  |
| <b>Figure S13.</b> | HSQC-DEPT spectrum (CDCl <sub>3</sub> ) of compound <b>4</b> .                                | S9  |
| <b>Figure S14.</b> | HMBC spectrum (CDCl <sub>3</sub> ) of compound <b>4</b> .                                     | S10 |
| <b>Figure S15.</b> | COSY spectrum (CDCl <sub>3</sub> ) of compound <b>4</b> .                                     | S10 |
| <b>Figure S16.</b> | HR-ESIMS spectrum of compound <b>4</b> .                                                      | S11 |
| <b>Figure S17.</b> | <sup>1</sup> H NMR spectrum (CDCl <sub>3</sub> ) of compound <b>5</b> .                       | S12 |
| <b>Figure S18.</b> | HSQC-DEPT spectrum (CDCl <sub>3</sub> ) of compound <b>5</b> .                                | S12 |
| <b>Figure S19.</b> | HMBC spectrum (CDCl <sub>3</sub> ) of compound <b>5</b> .                                     | S13 |
| <b>Figure S20.</b> | COSY spectrum (CDCl <sub>3</sub> ) of compound <b>5</b> .                                     | S13 |
| <b>Figure S21.</b> | HR-ESIMS spectrum of compound <b>5</b> .                                                      | S14 |
| <b>Figure S22.</b> | <sup>1</sup> H NMR spectrum (CDCl <sub>3</sub> ) of compound <b>6</b> .                       | S15 |
| <b>Figure S23.</b> | HSQC-DEPT spectrum (CDCl <sub>3</sub> ) of compound <b>6</b> .                                | S15 |
| <b>Figure S24.</b> | HMBC spectrum (CDCl <sub>3</sub> ) of compound <b>6</b> .                                     | S16 |
| <b>Figure S25.</b> | COSY spectrum (CDCl <sub>3</sub> ) of compound <b>6</b> .                                     | S16 |
| <b>Figure S26.</b> | HR-ESIMS spectrum of compound <b>6</b> .                                                      | S17 |
| <b>Figure S27.</b> | <sup>1</sup> H NMR spectrum (CDCl <sub>3</sub> ) of compound <b>7</b> .                       | S18 |
| <b>Figure S28.</b> | EIMS spectrum of compound <b>7</b> .                                                          | S18 |
| <b>Figure S29.</b> | <sup>1</sup> H NMR spectrum (CDCl <sub>3</sub> ) of compound <b>8</b> .                       | S19 |
| <b>Figure S30.</b> | EIMS spectrum of compound <b>8</b> .                                                          | S19 |
| <b>Figure S31.</b> | <sup>1</sup> H NMR spectrum (CDCl <sub>3</sub> ) of compound <b>9</b> .                       | S20 |
| <b>Figure S32.</b> | EIMS spectrum of compound <b>9</b> .                                                          | S20 |
| <b>Figure S33.</b> | <sup>1</sup> H NMR spectrum (CDCl <sub>3</sub> ) of compound <b>10</b> .                      | S21 |
| <b>Figure S34.</b> | EIMS spectrum of compound <b>10</b> .                                                         | S21 |
| <b>Figure S35.</b> | <sup>1</sup> H NMR spectrum (CDCl <sub>3</sub> ) of compound <b>11</b> .                      | S22 |
| <b>Figure S36.</b> | EIMS spectrum of compound <b>11</b> .                                                         | S22 |
| <b>Figure S37.</b> | <sup>1</sup> H NMR spectrum (CDCl <sub>3</sub> ) of compound <b>12</b> .                      | S23 |
| <b>Figure S38.</b> | EIMS spectrum of compound <b>12</b> .                                                         | S23 |
| <b>Figure S39.</b> | <sup>1</sup> H NMR spectrum (CDCl <sub>3</sub> ) of compound <b>13</b> .                      | S24 |
| <b>Figure S40.</b> | EIMS spectrum of compound <b>13</b> .                                                         | S24 |
| <b>Figure S41.</b> | <sup>1</sup> H NMR spectrum (CDCl <sub>3</sub> ) of compound <b>14</b> .                      | S25 |
| <b>Figure S42.</b> | EIMS spectrum of compound <b>14</b> .                                                         | S25 |

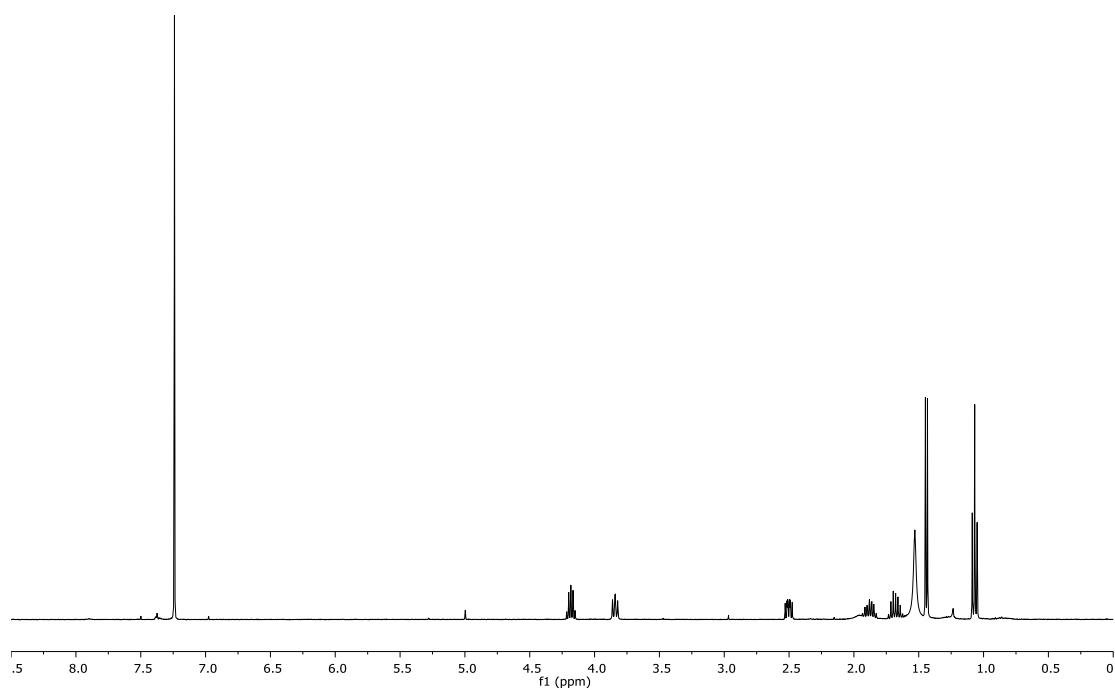

**Figure S1.**  $^1\text{H}$  NMR spectrum ( $\text{CDCl}_3$ ) of compound **1**.

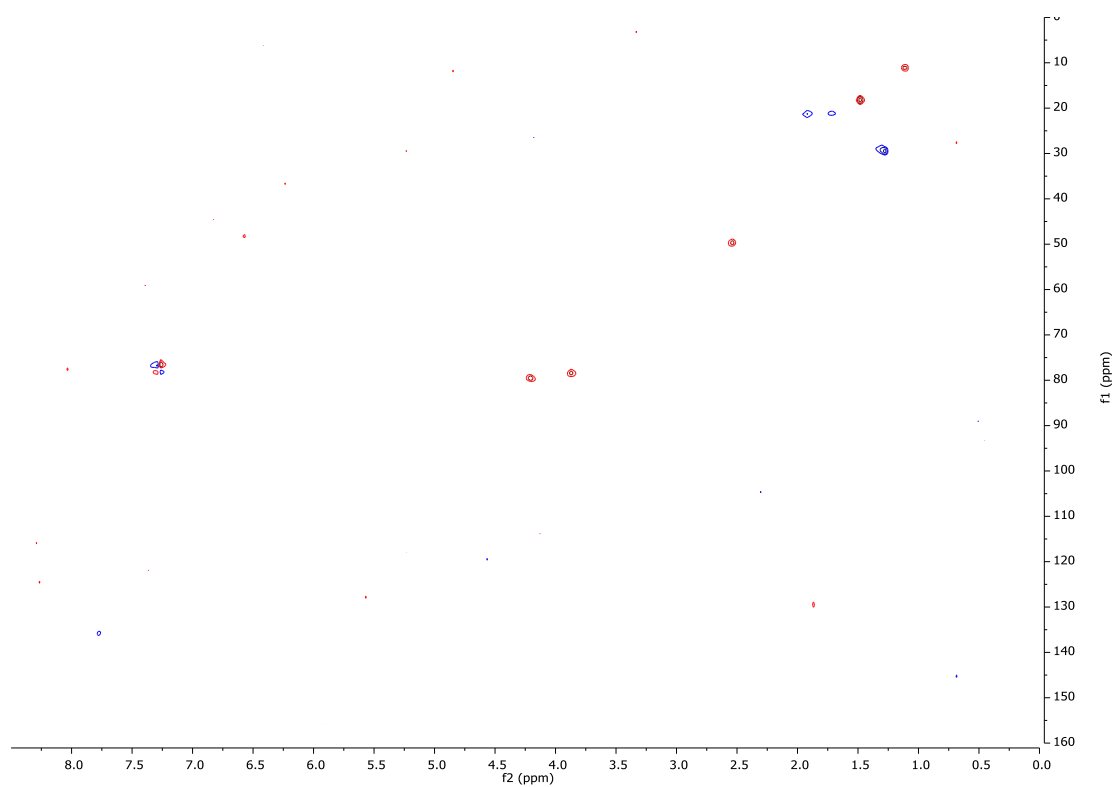

**Figure S2.** HSQC-DEPT spectrum ( $\text{CDCl}_3$ ) of compound **1**.

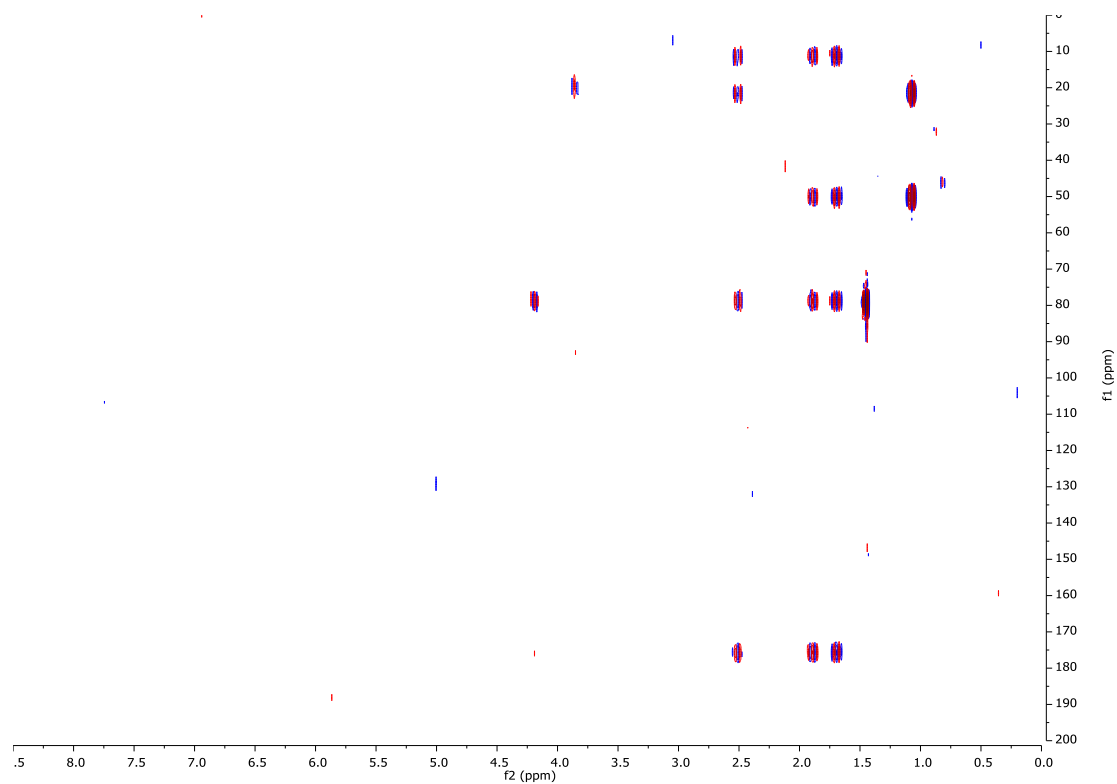

**Figure S3.** HMBC spectrum (CDCl<sub>3</sub>) of compound **1**.

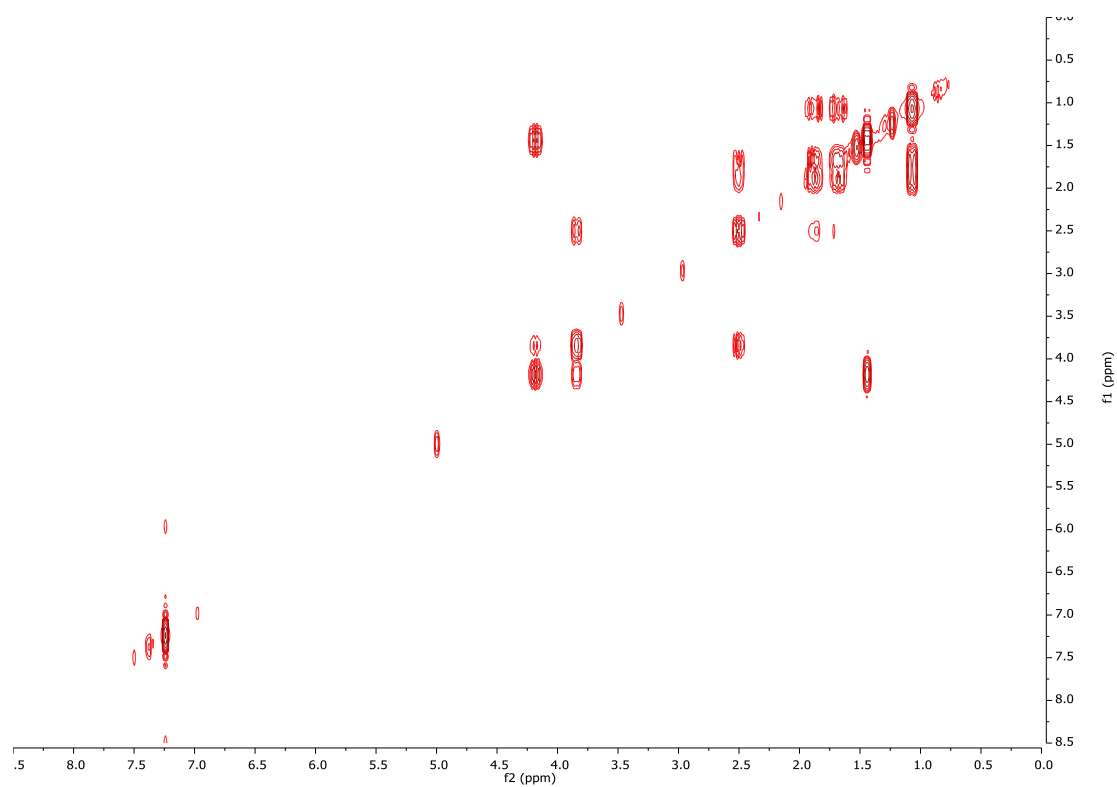

**Figure S4.** COSY spectrum (CDCl<sub>3</sub>) of compound **1**.

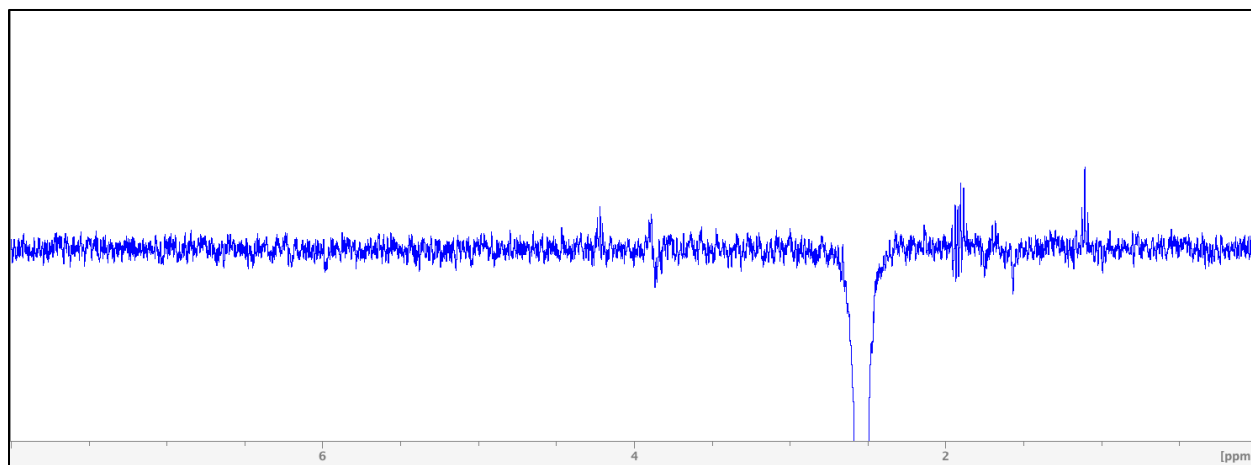

**Figure S5.** 1D NOE difference spectrum (CDCl<sub>3</sub>) of compound **1** upon irradiation of H-2.

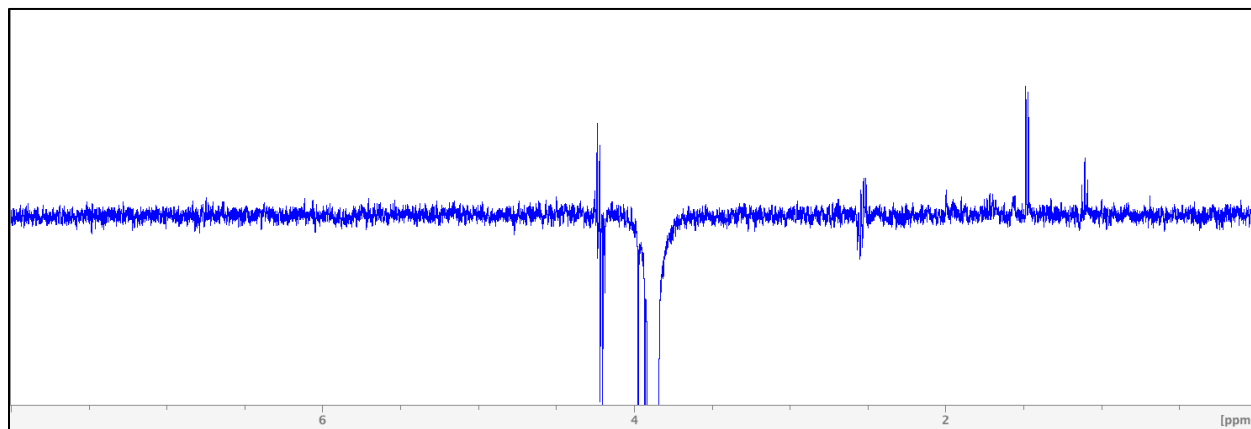

**Figure S6.** 1D NOE difference spectrum (CDCl<sub>3</sub>) of compound **1** upon irradiation of H-3.

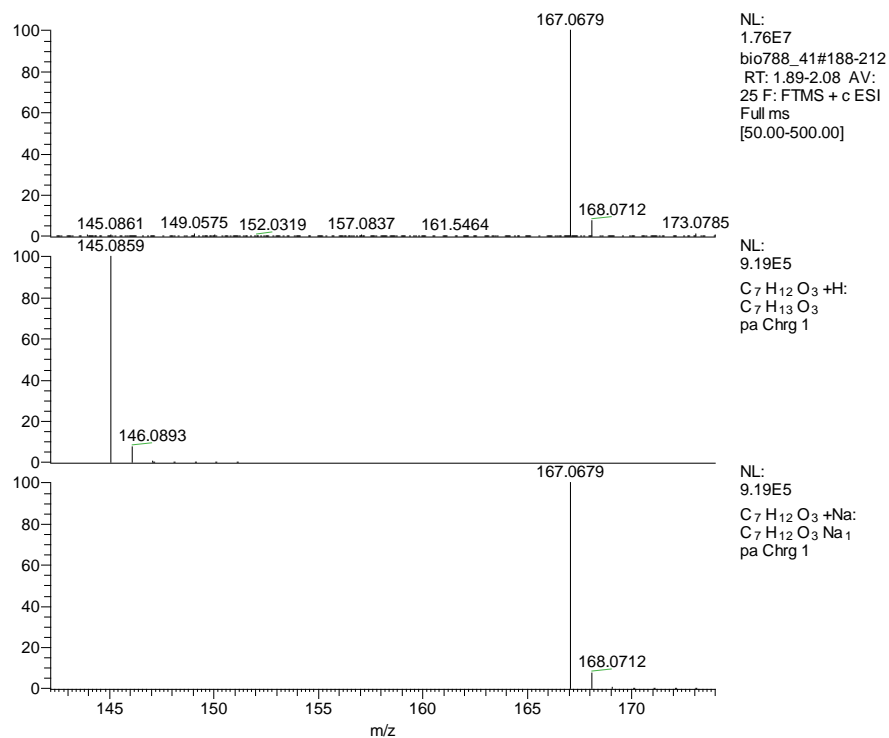

**Figure S7.** HR-ESIMS spectrum of compound **1**.

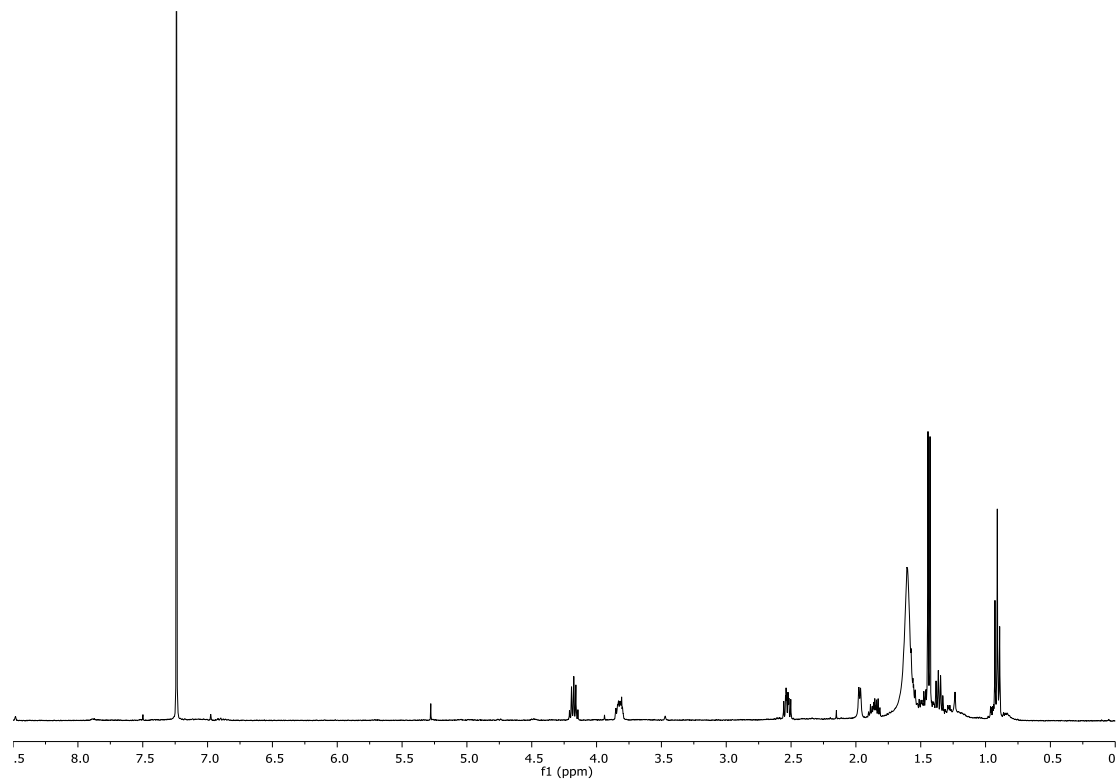

**Figure S8.** <sup>1</sup>H NMR spectrum (CDCl<sub>3</sub>) of compound 2.

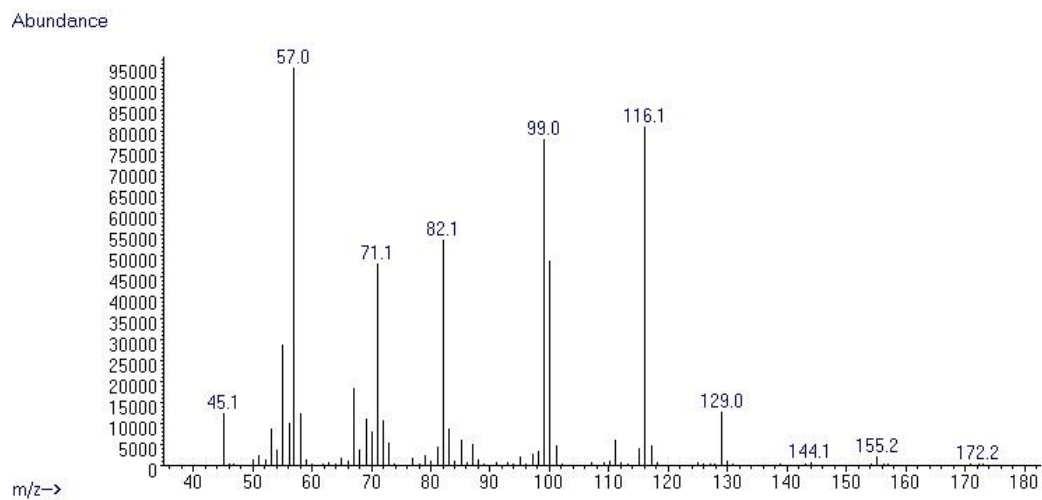

**Figure S9.** EIMS spectrum of compound 2.

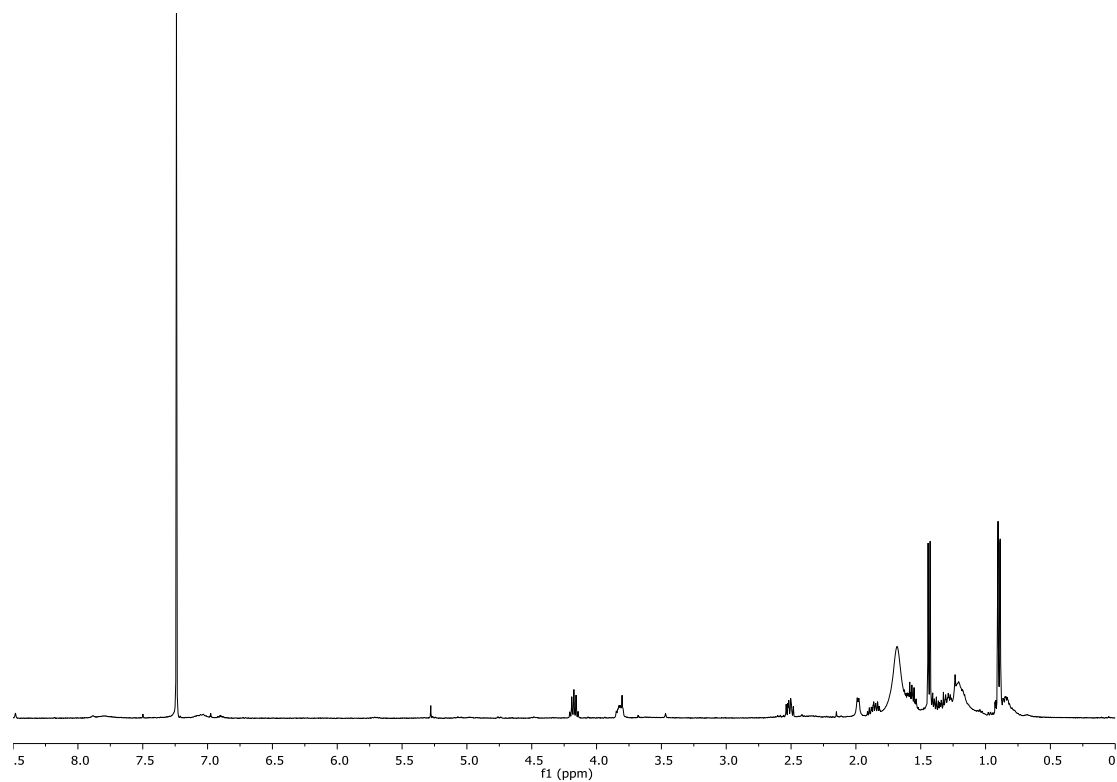

**Figure S10.** <sup>1</sup>H NMR spectrum (CDCl<sub>3</sub>) of compound 3.

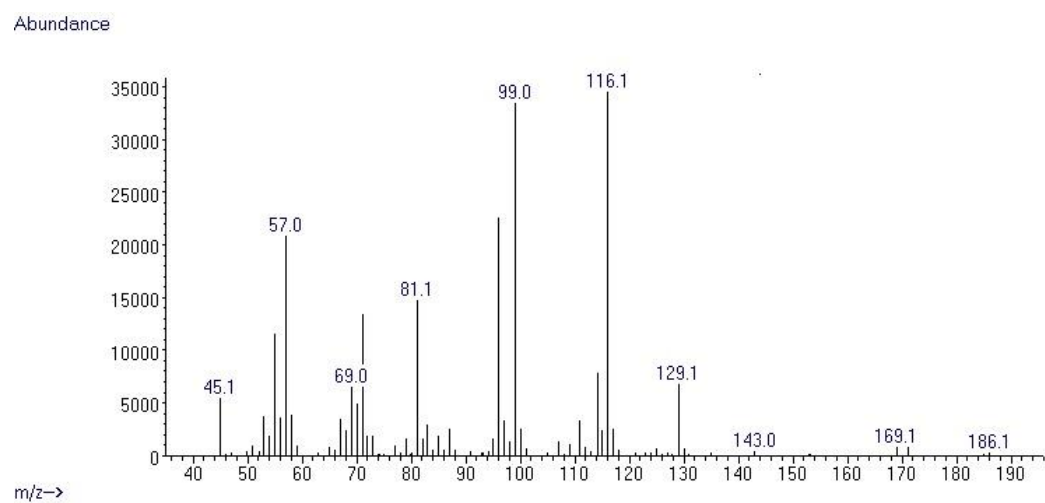

**Figure S11.** EIMS spectrum of compound 3.



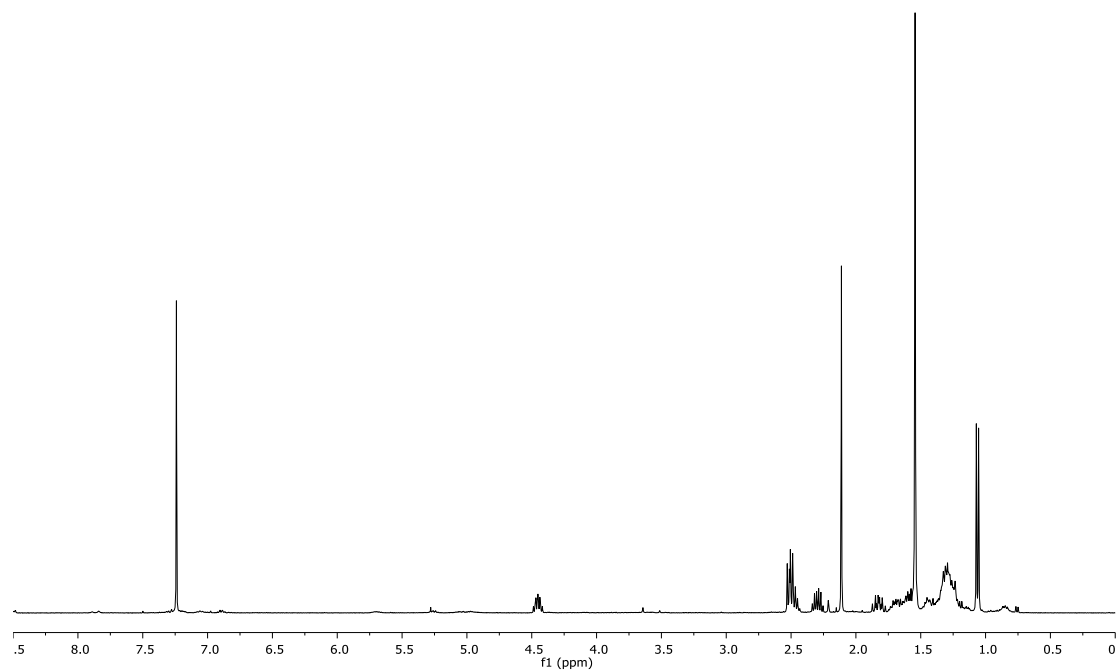

**Figure S12.**  $^1\text{H}$  NMR spectrum ( $\text{CDCl}_3$ ) of compound **4**.

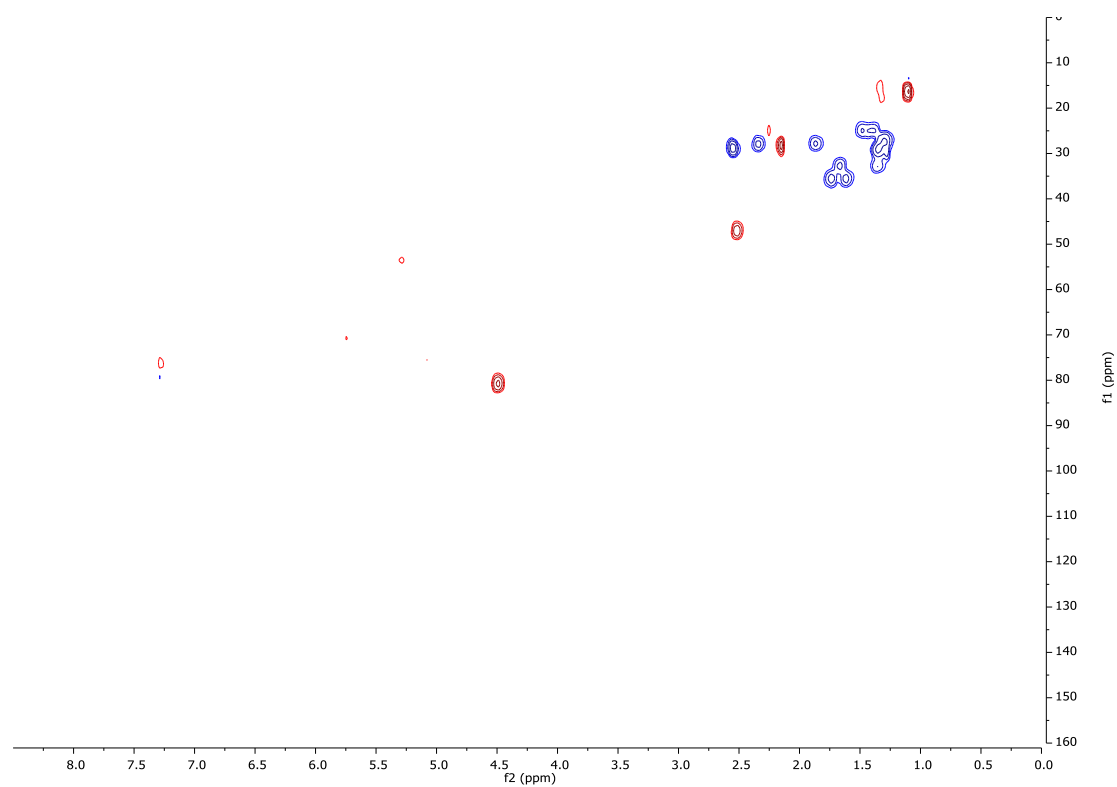

**Figure S13.** HSQC-DEPT spectrum ( $\text{CDCl}_3$ ) of compound **4**.

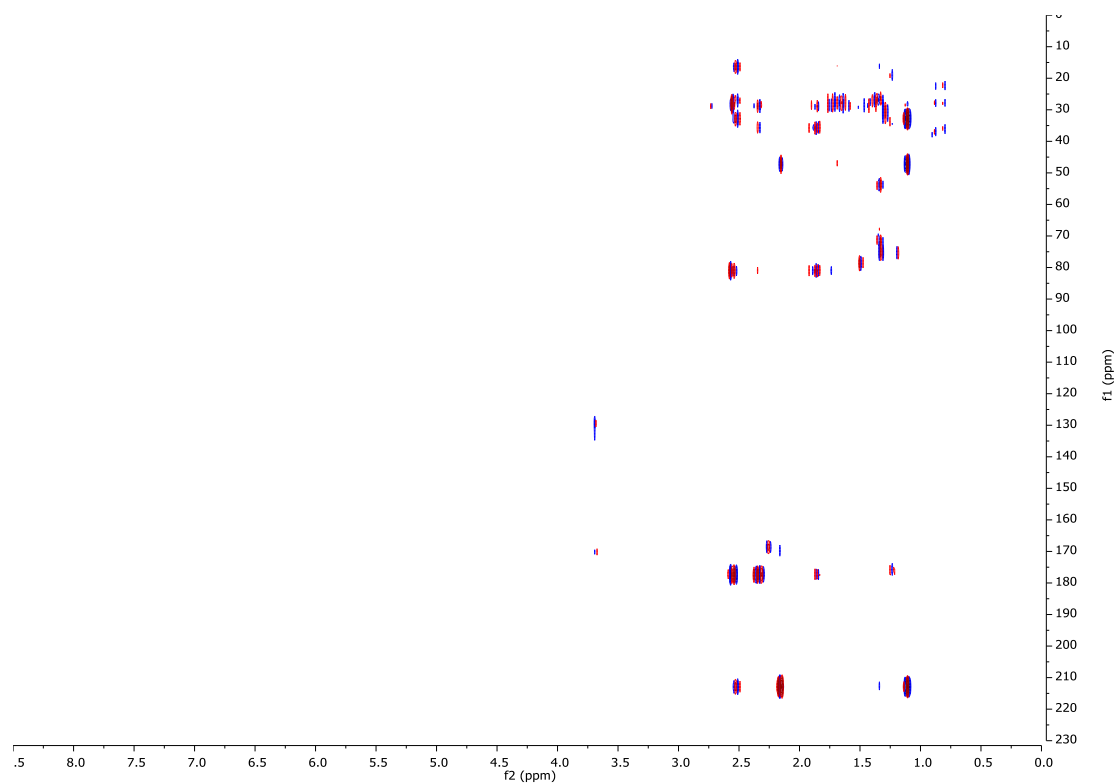

**Figure S14.** HMBC spectrum ( $\text{CDCl}_3$ ) of compound **4**.

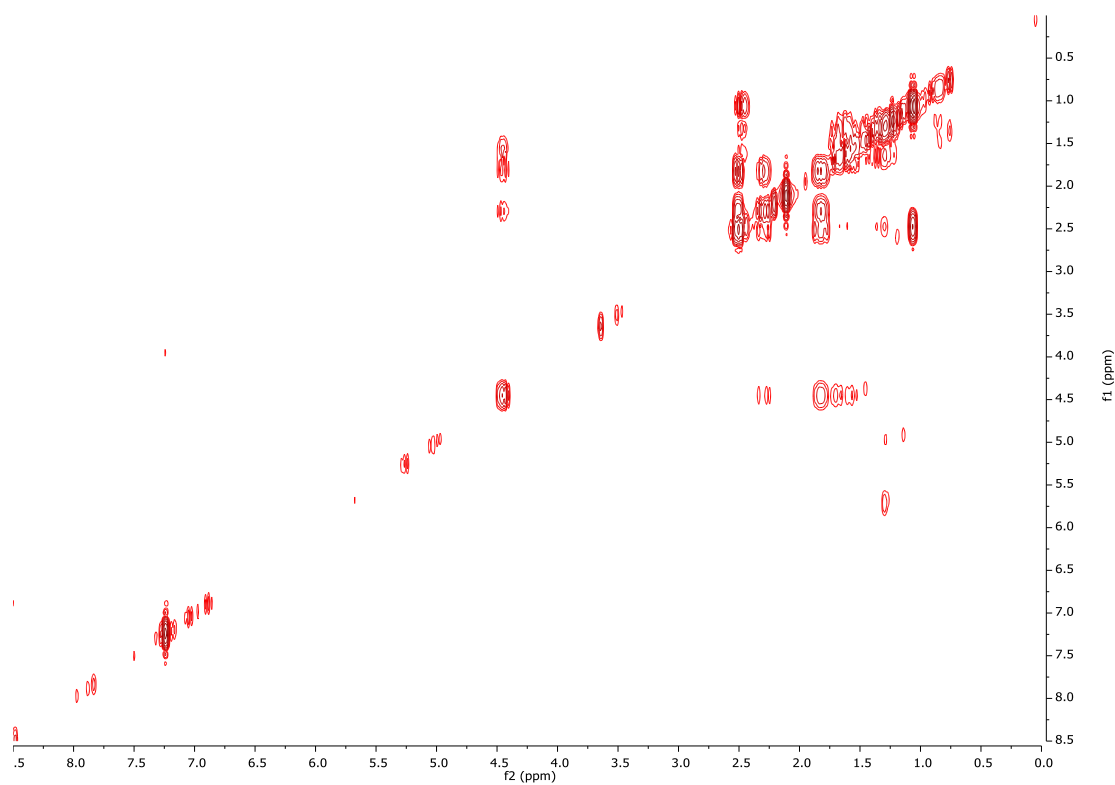

**Figure S15.** COSY spectrum ( $\text{CDCl}_3$ ) of compound **4**.

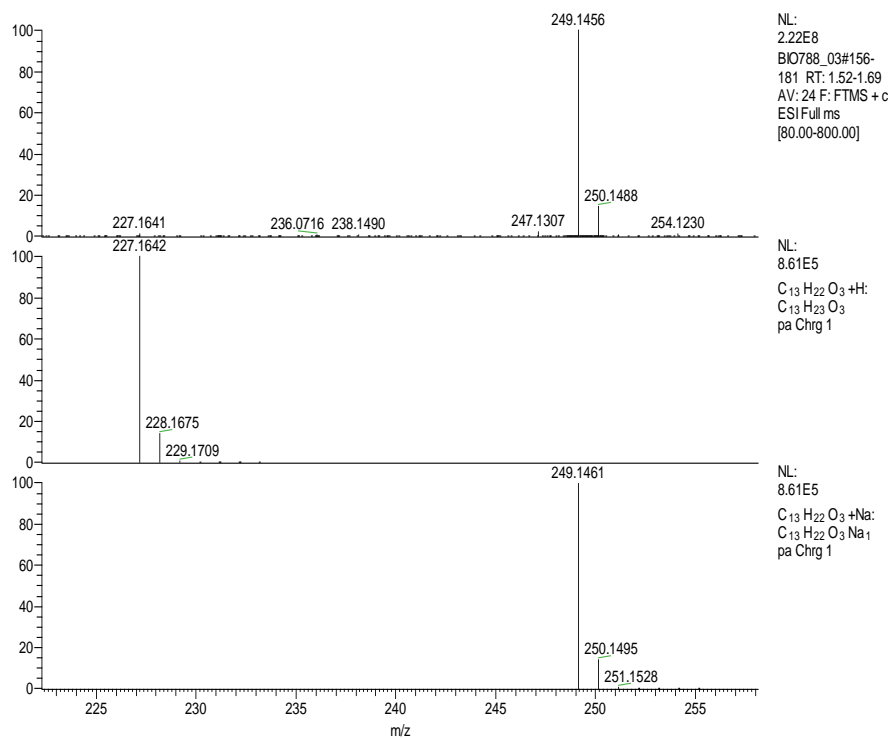

**Figure S16.** HR-ESIMS spectrum of compound 4.

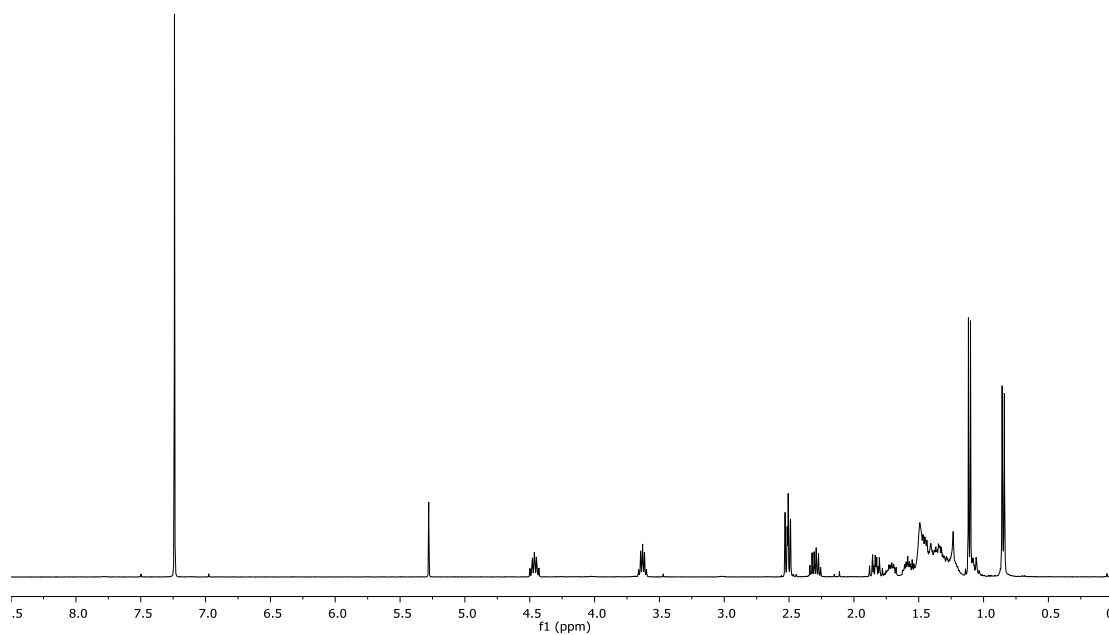

**Figure S17.**  $^1\text{H}$  NMR spectrum ( $\text{CDCl}_3$ ) of compound **5**.

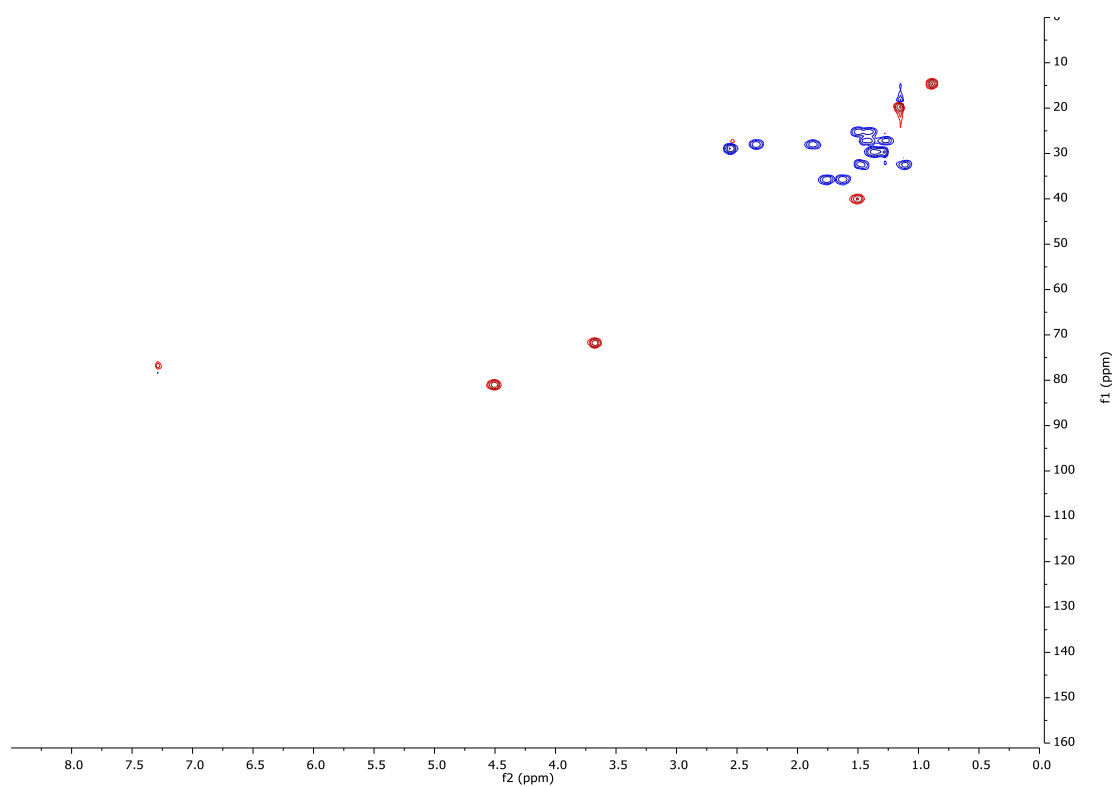

**Figure S18.** HSQC-DEPT spectrum ( $\text{CDCl}_3$ ) of compound **5**.

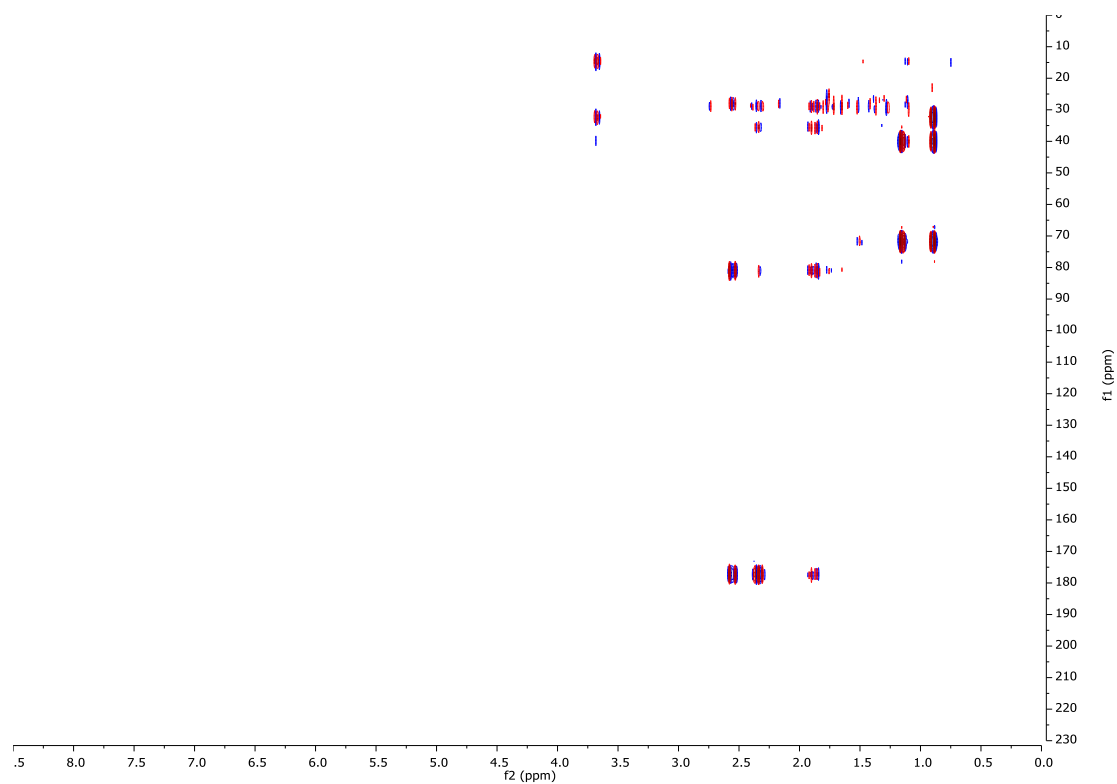

**Figure S19.** HMBC spectrum (CDCl<sub>3</sub>) of compound 5.

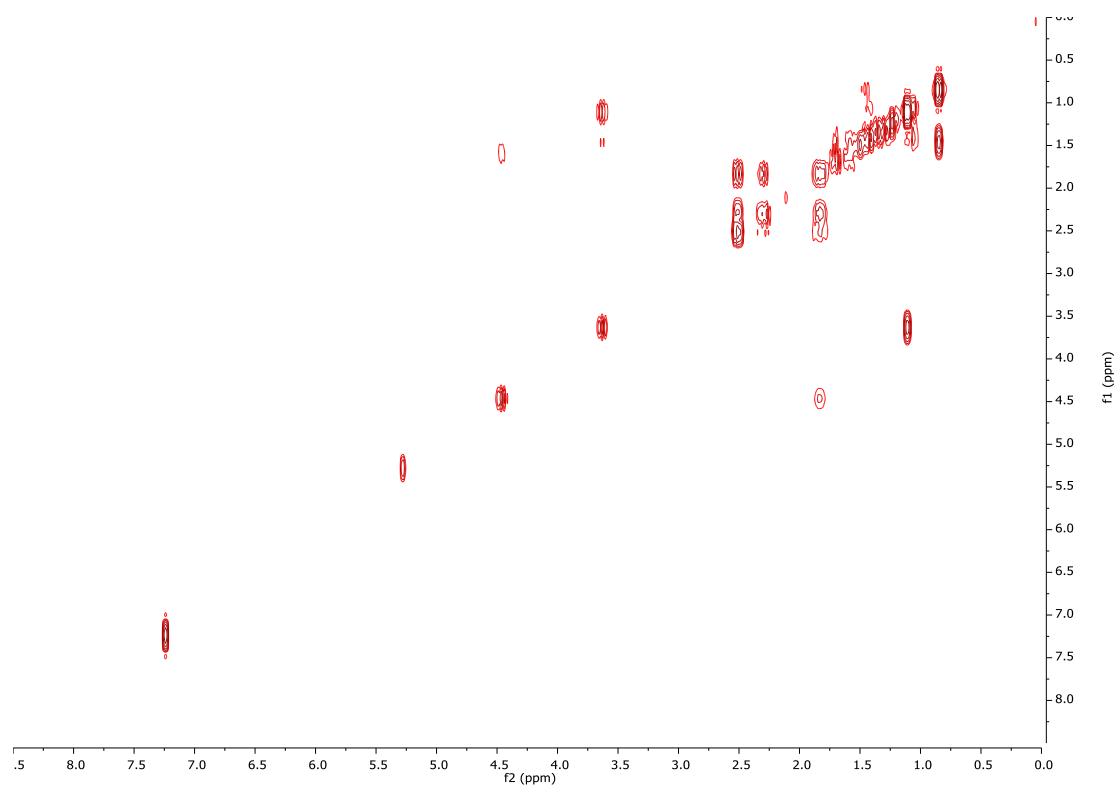

**Figure S20.** COSY spectrum (CDCl<sub>3</sub>) of compound 5.

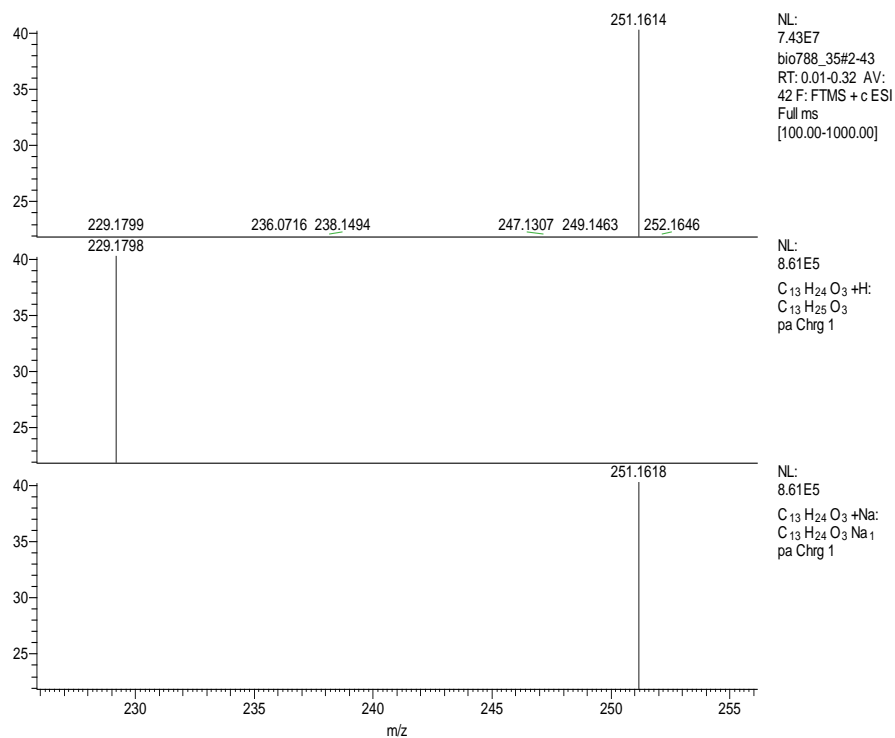

**Figure S21.** HR-ESIMS spectrum of compound **5**.

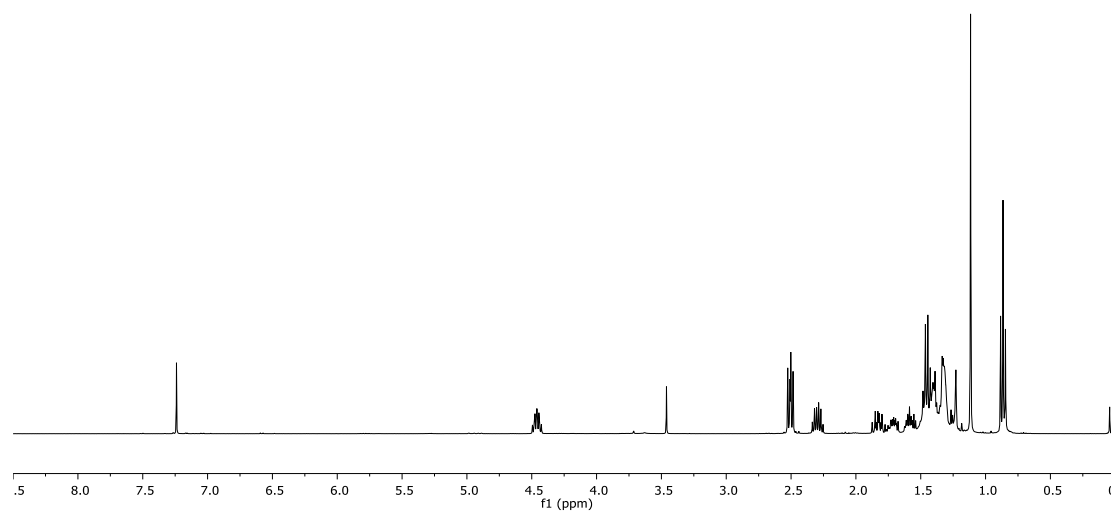

**Figure S22.**  $^1\text{H}$  NMR spectrum ( $\text{CDCl}_3$ ) of compound **6**.

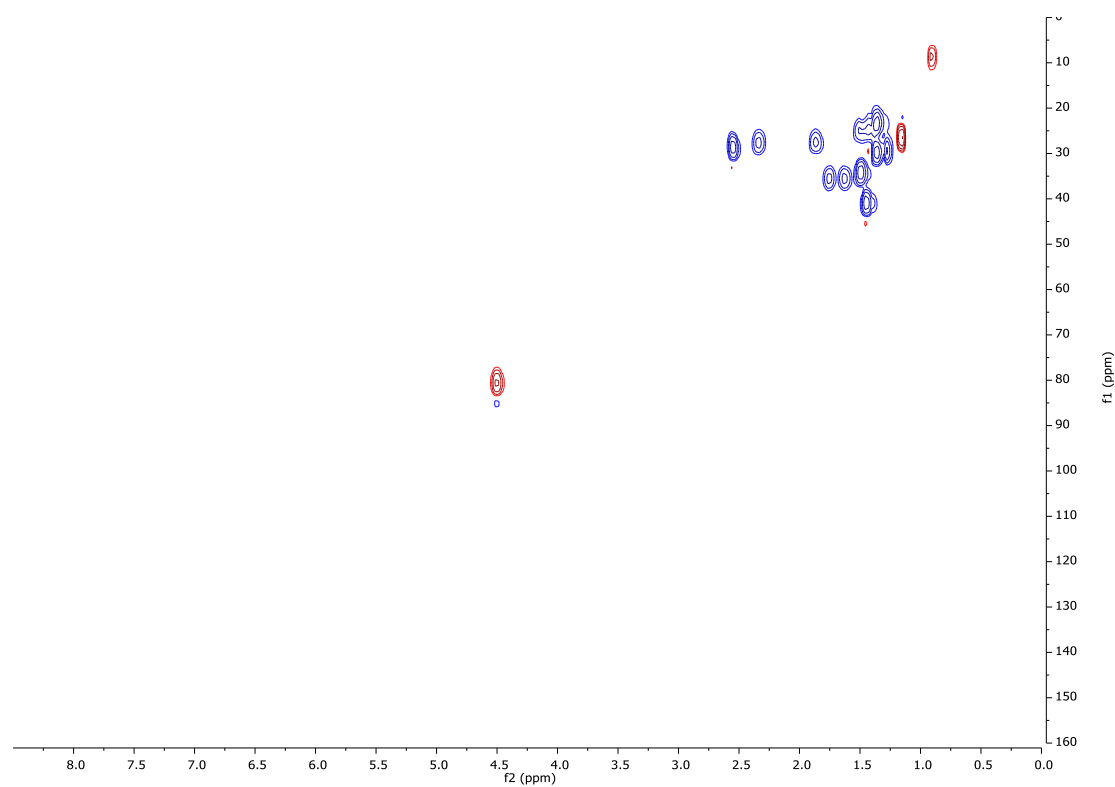

**Figure S23.** HSQC-DEPT spectrum ( $\text{CDCl}_3$ ) of compound **6**.

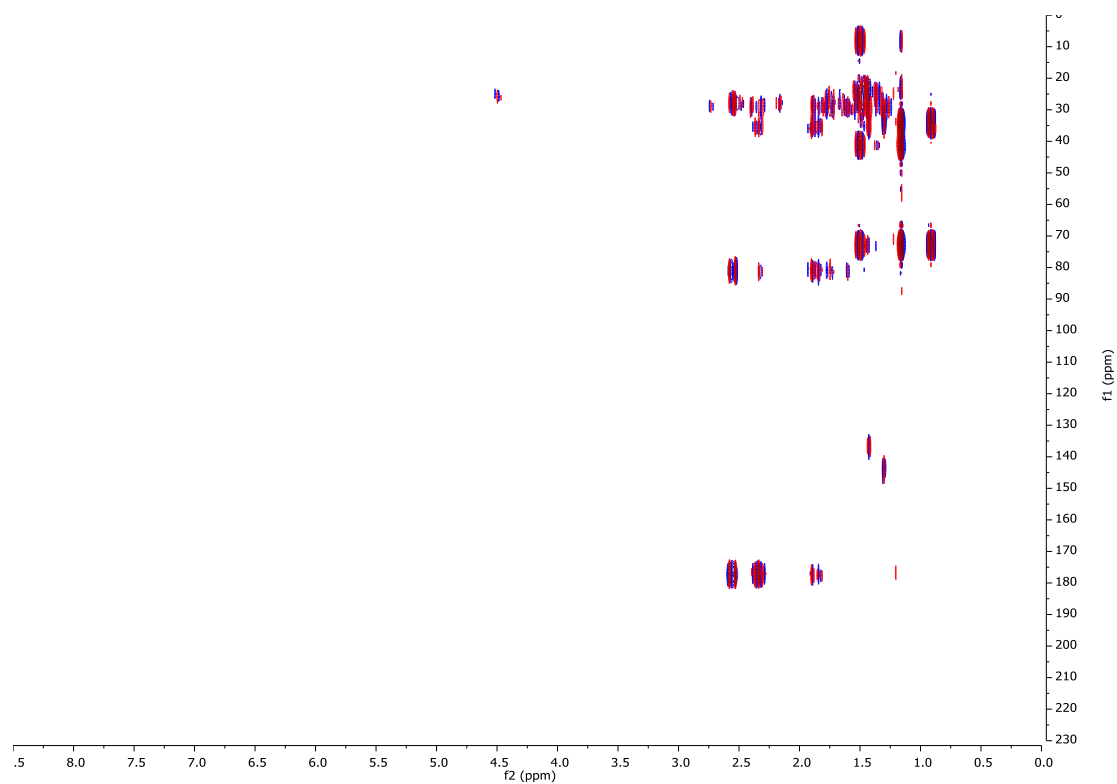

**Figure S24.** HMBC spectrum (CDCl<sub>3</sub>) of compound 6.

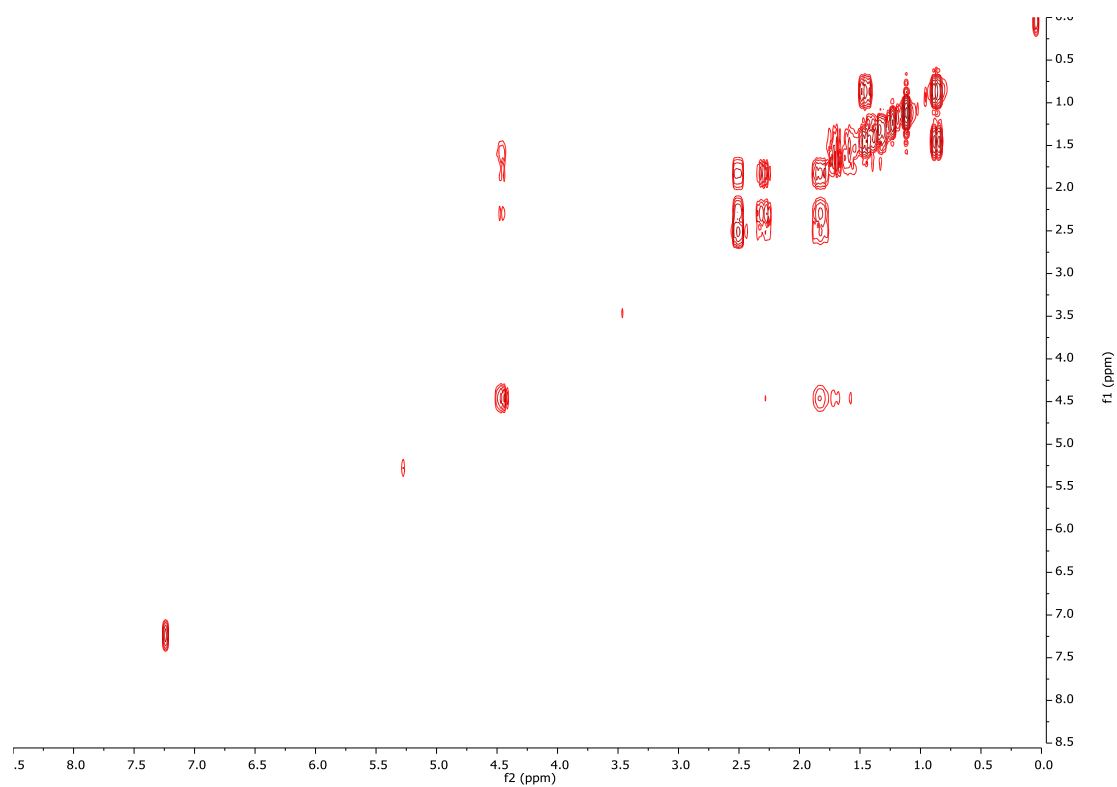

**Figure S25.** COSY spectrum (CDCl<sub>3</sub>) of compound 6.



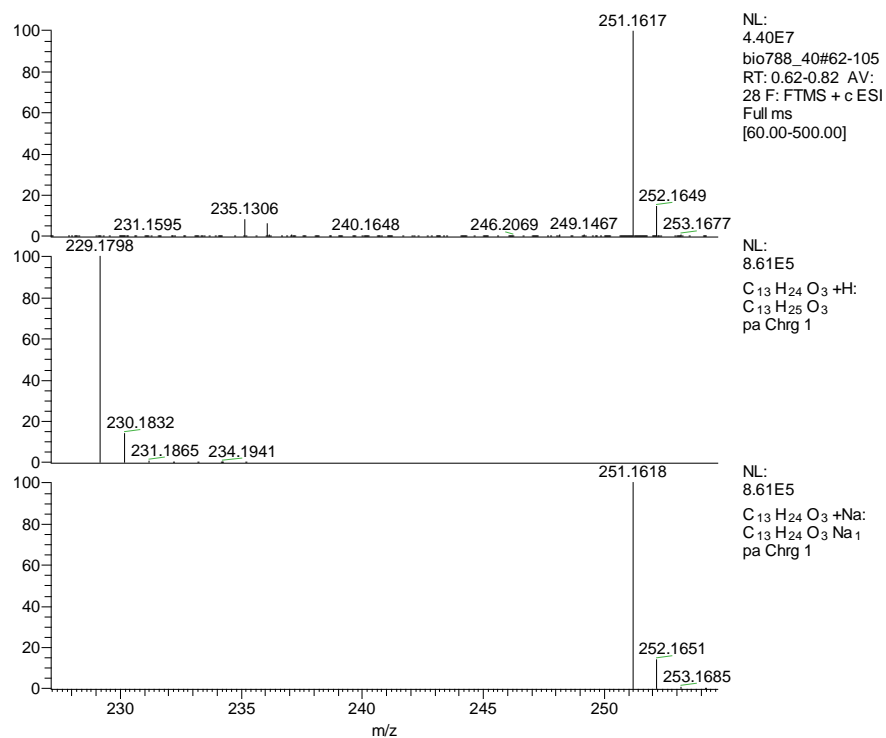

Figure S26. HR-ESIMS spectrum of compound 6.

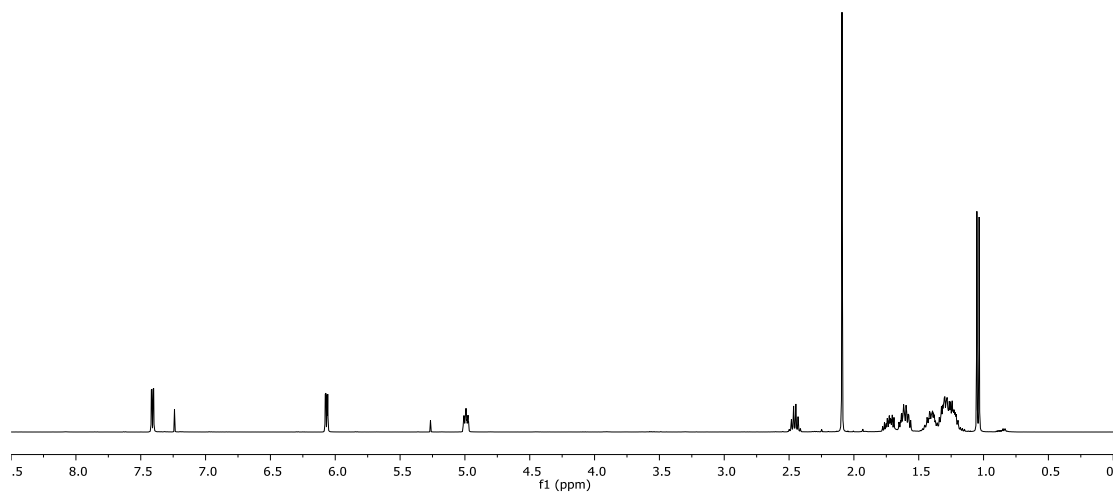

**Figure S27.**  $^1\text{H}$  NMR spectrum ( $\text{CDCl}_3$ ) of compound 7.

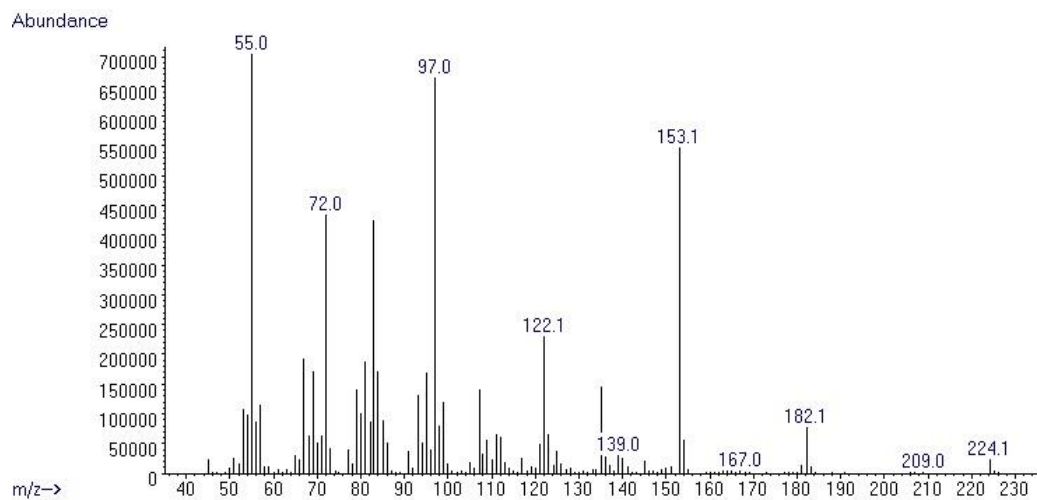

**Figure S28.** EIMS spectrum of compound 7.

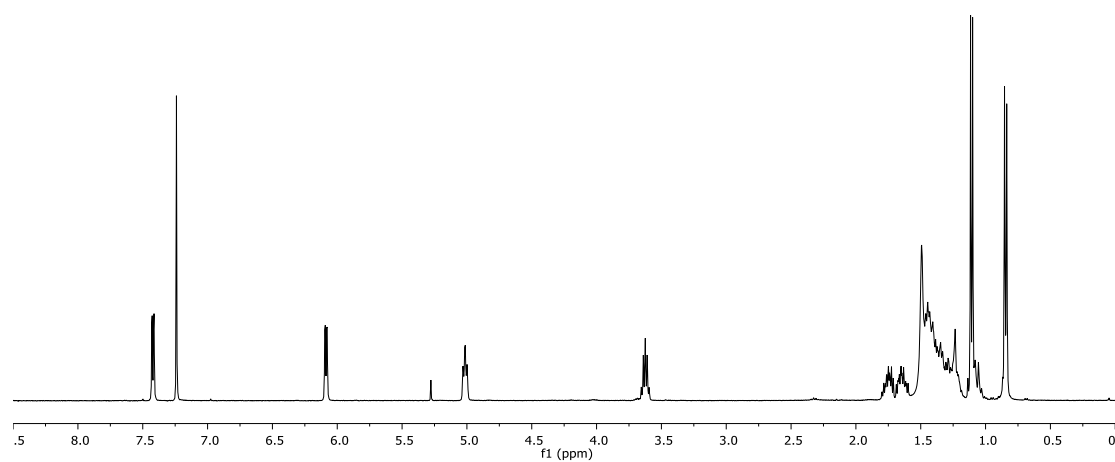

**Figure S29.** <sup>1</sup>H NMR spectrum (CDCl<sub>3</sub>) of compound 8.

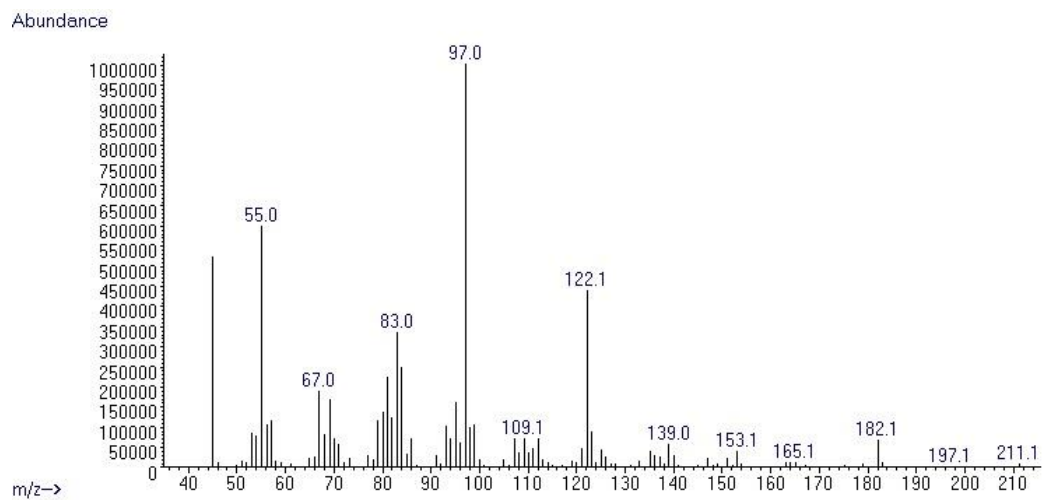

**Figure S30.** EIMS spectrum of compound 8.

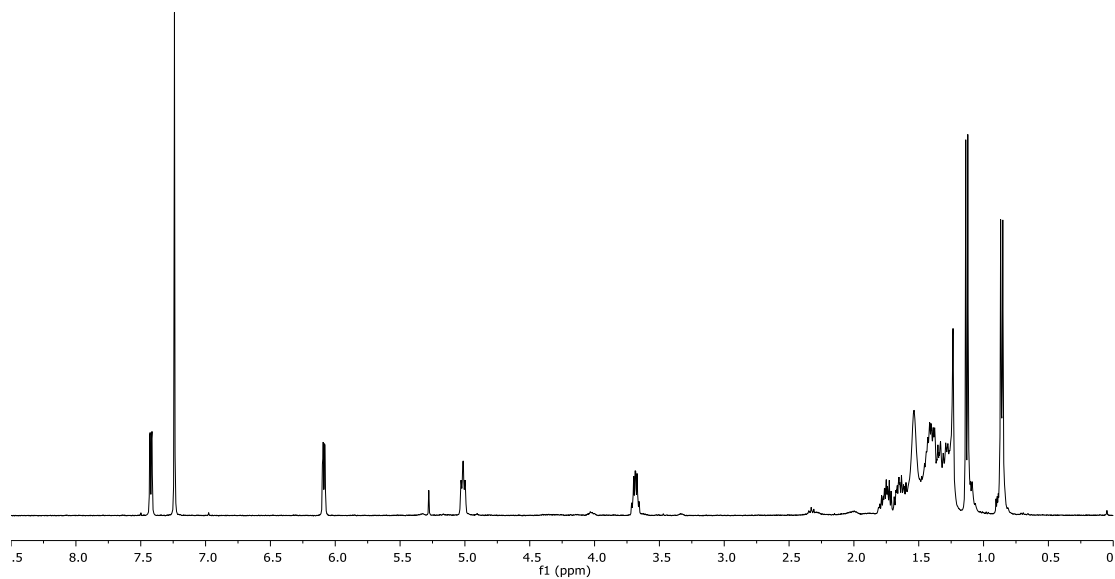

**Figure S31.**  $^1\text{H}$  NMR spectrum ( $\text{CDCl}_3$ ) of compound **9**.

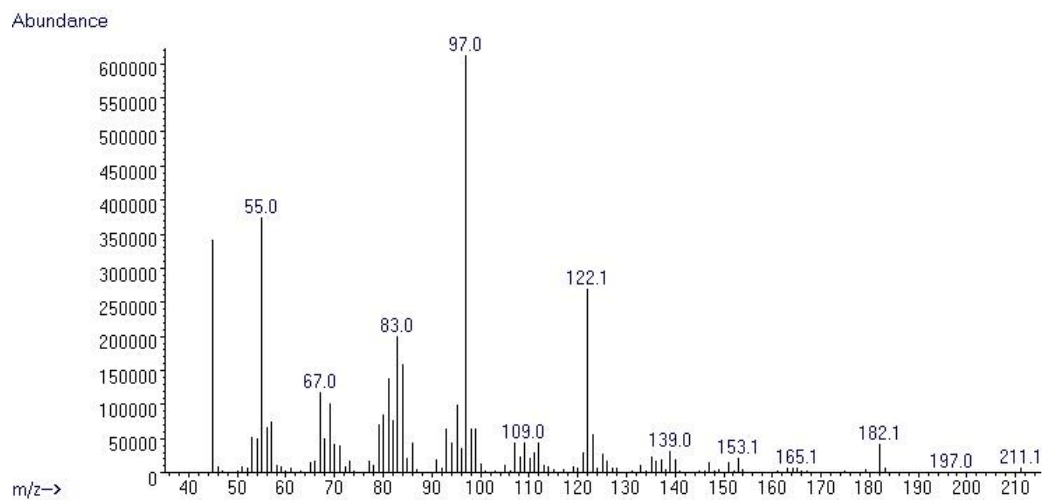

**Figure S32.** EIMS spectrum of compound **9**.

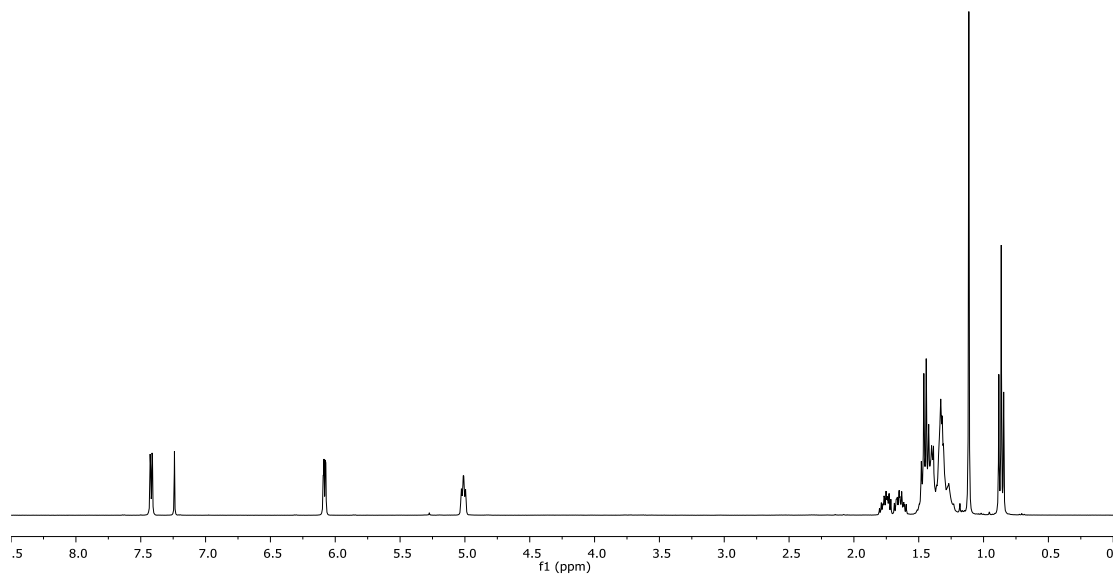

**Figure S33.** <sup>1</sup>H NMR spectrum (CDCl<sub>3</sub>) of compound 10.

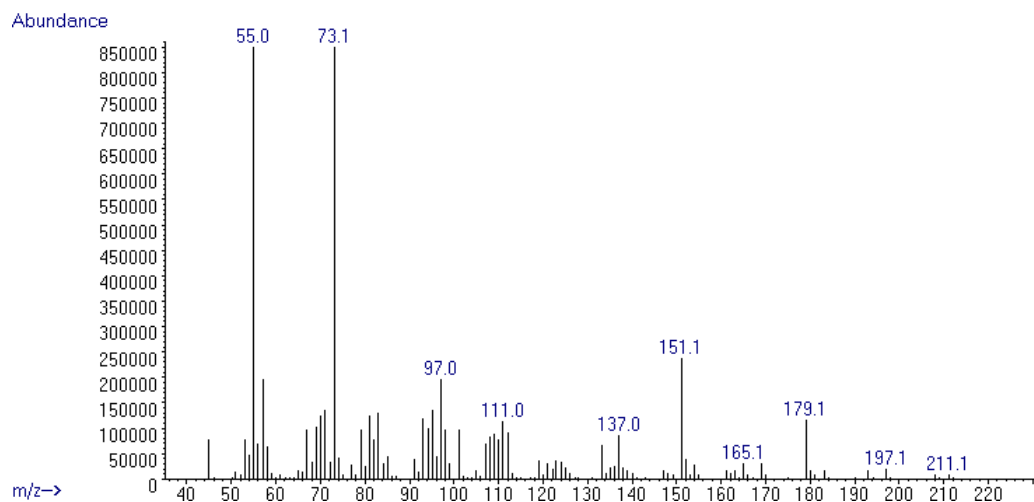

**Figure S34.** EIMS spectrum of compound 10.

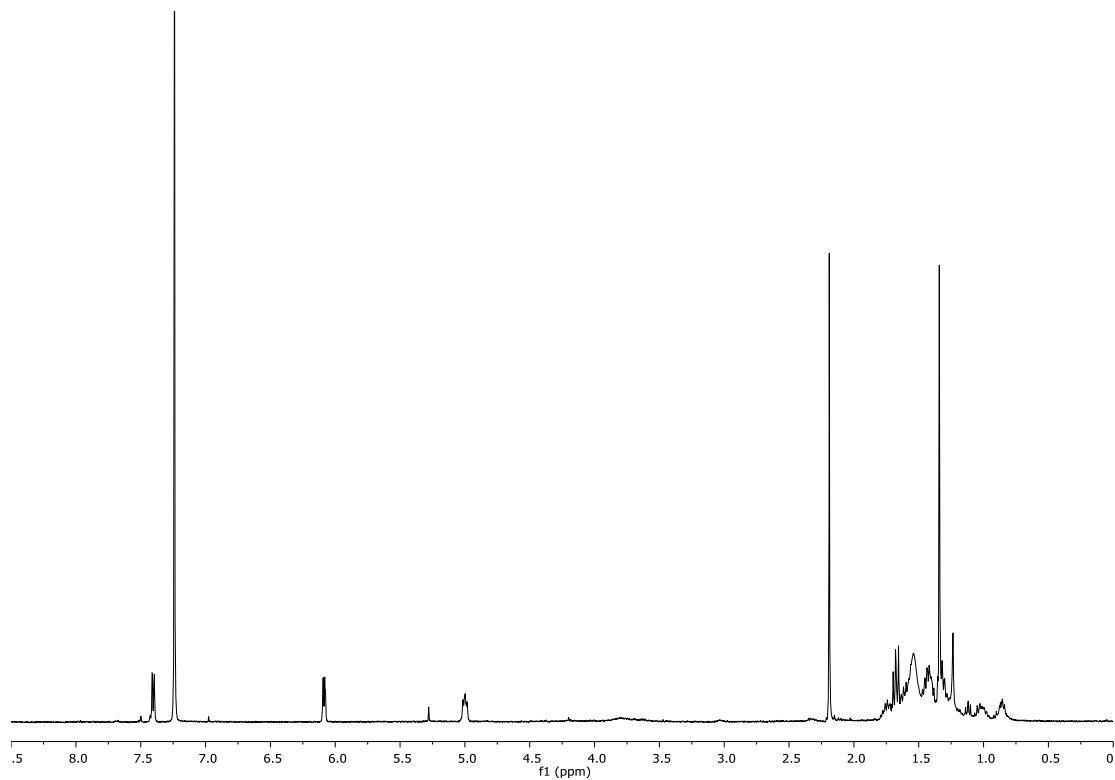

**Figure S35.**  $^1\text{H}$  NMR spectrum ( $\text{CDCl}_3$ ) of compound 11.

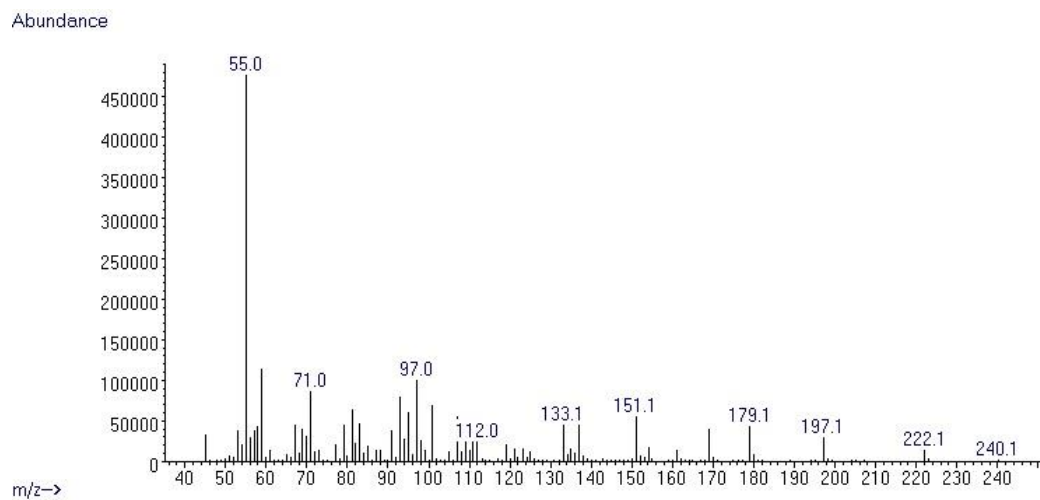

**Figure S36.** EIMS spectrum of compound 11.

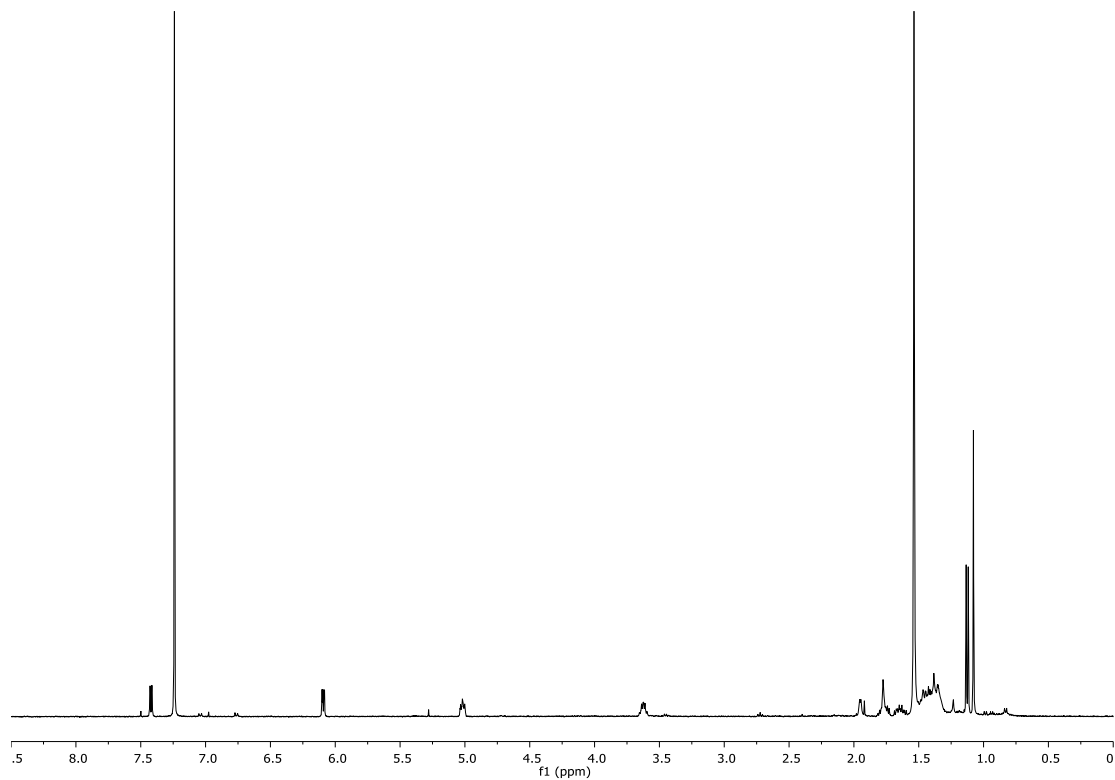

**Figure S37.**  $^1\text{H}$  NMR spectrum ( $\text{CDCl}_3$ ) of compound 12.

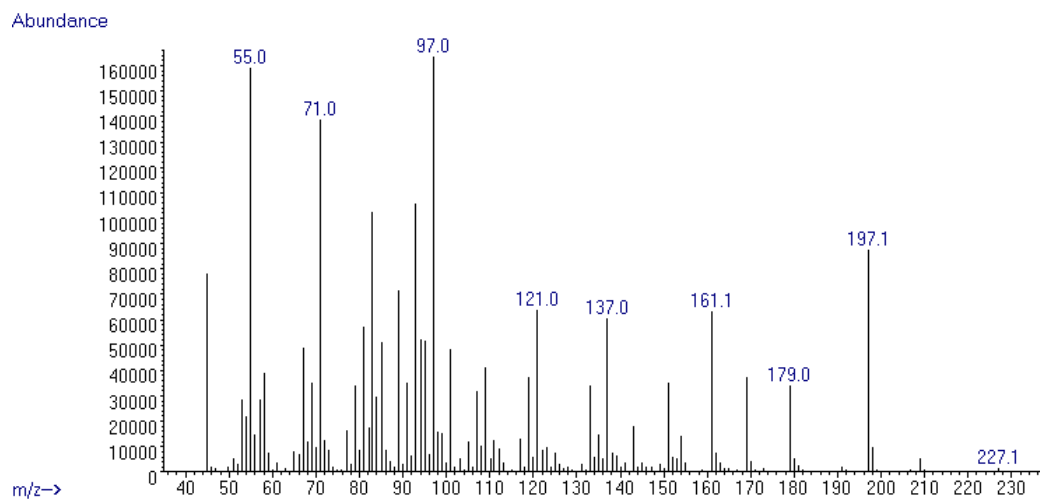

**Figure S38.** EIMS spectrum of compound 12.

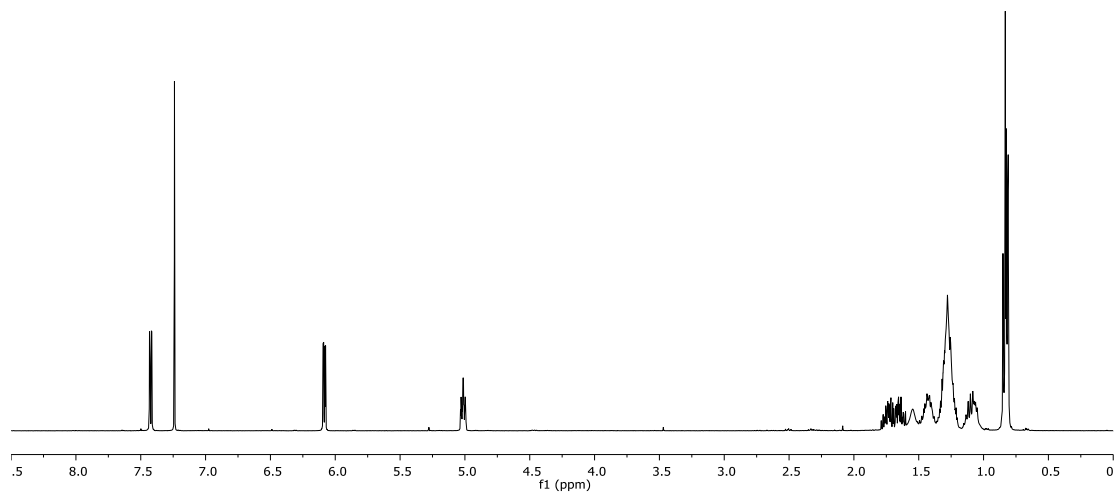

**Figure S39.** <sup>1</sup>H NMR spectrum (CDCl<sub>3</sub>) of compound 13.

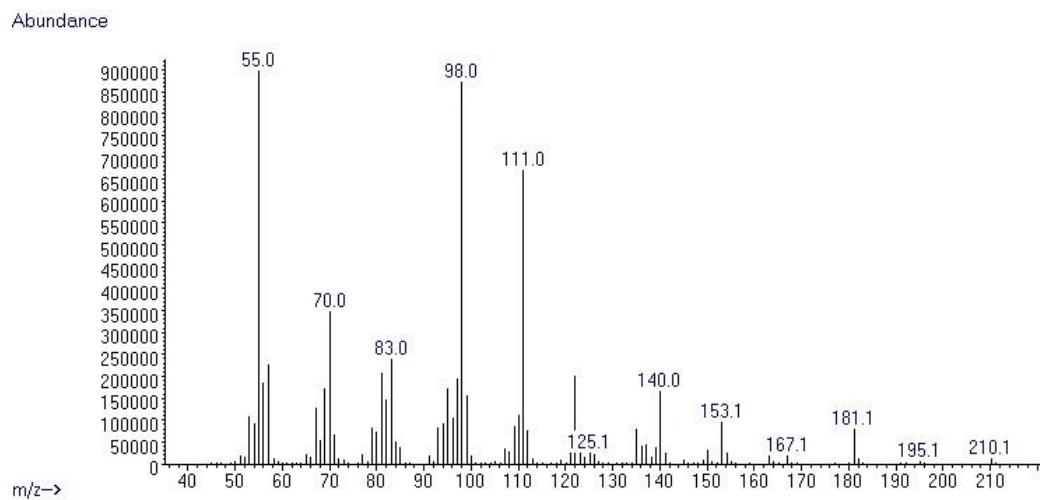

**Figure S40.** EIMS spectrum of compound 13.



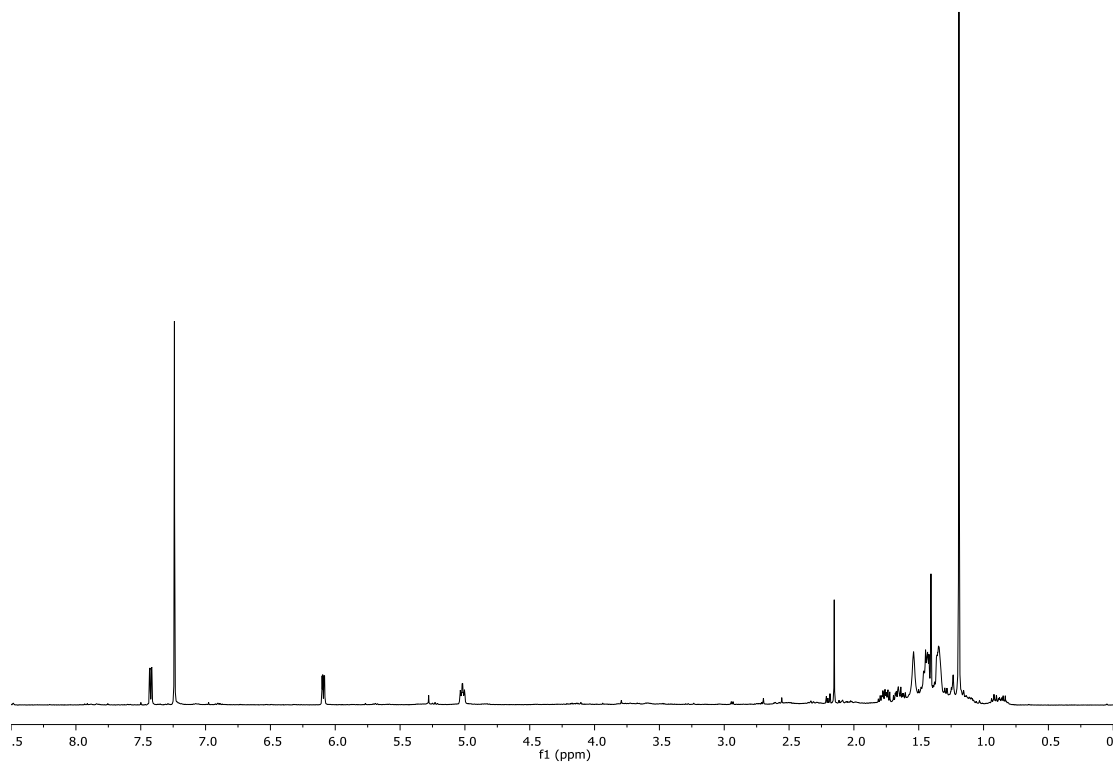

**Figure S41.** <sup>1</sup>H NMR spectrum (CDCl<sub>3</sub>) of compound **14**.

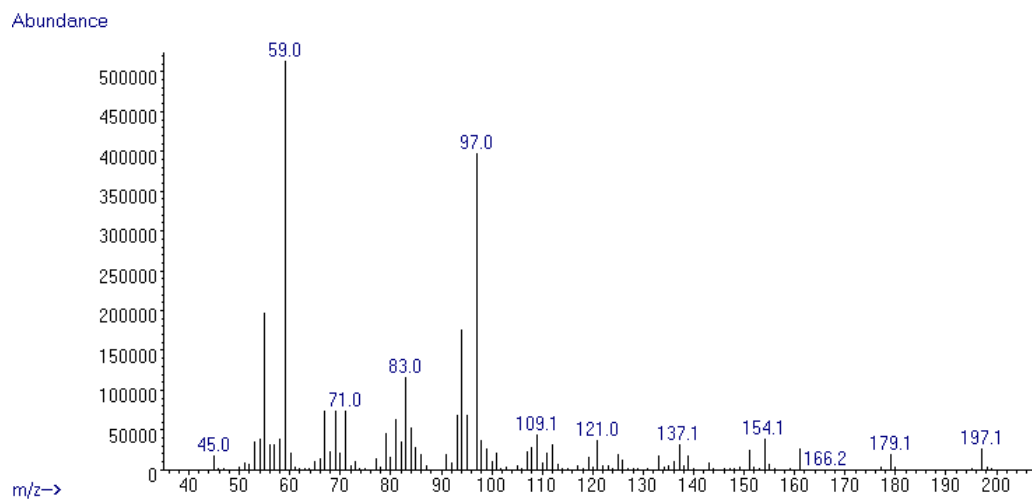

**Figure S42.** EIMS spectrum of compound **14**.
